# Supplementary material
Source: publisher figshare collection journal article supplement (https://frontiersin.figshare.com/ndownloader/files/31697123)
Supplement: Supplementary file 1 [file 31697123]

***Supplementary Materials***

# The method of quantitative proteomic analysis

## Protein extraction, iTRAQ labeling, and LC-MS/MS analysis

Six samples in the solvent control and OA-treated group with three biological replicates per treatment were used in the proteomic analysis. Protein extraction, iTRAQ labeling, and LC-MS/MS analysis were conducted based on standard proteomics methods (Han et al., 2013). Briefly, the digestive gland samples were ground into powder with liquid nitrogen and dissolved in lysis buffer (9 M urea, 4% CHAPS, 1% w/v DTT, and 1% IPG buffer) with protease inhibitor (Roche Applied Science, Mannheim, Germany) to extract proteins. The concentrations of the protein extracts were quantified according to the Bradford (1976) method. The protein samples were labeled using iTRAQ 8-plex reagents (iTRAQ® Reagent-8PLEX Multiplex Kit, Sigma) according to the manufacturer's protocol and then purified by high-performance liquid chromatography (HPLC). An Eksigent nano LC-Ultra™ 2D System (AB SCIEX, Framingham, MA, USA) and a Triple TOF 5600 System (AB SCIEX, Framingham, MA, USA) were utilized for LC-MS/MS analysis.

## Protein identification and quantitation

Protein Pilot Software v. 5.0 (AB SCIEX, USA) was used to analyze the acquired MS/MS raw data, and protein identification was performed using the Paragon algorithm against a Mollusca-EST-Translated protein database (Shilov et al., 2007). The parameters were set as follows: a mass tolerance of 10 ppm for precursor ion scans and a mass tolerance of 0.02 Da for the production scans were used. Carbamidomethyl was specified in PD 2.2 as a fixed modification. Oxidation of methionine, acetylation of the N-terminus, iTRAQ 8-plex of tyrosine and lysine were specified in PD 2.2 as variable modifications. For protein identification, proteins with at least 1 unique peptide were identified at a false discovery rate (FDR) less than 1.0% at the peptide and protein levels. Proteins containing similar peptides that could not be distinguished based on the MS/MS analysis were grouped separately as protein groups. The protein quantitation results were statistically analyzed by the Mann-Whitney test, and significant ratios, defined as a protein ratio < 0.5 or > 2.0 (*P* < 0.05), were used to screen the differentially expressed proteins (DEPs).

1. **Table**

Table S1 Primer sequences used for real-time quantitative PCR analysis.

| Gene name | Forward primer | Reverse primer | GenBank accession number |
| --- | --- | --- | --- |
| β-actin | CAAACAGCAGCCTCCTCGTCAT | CTGGGCACCTGAACCTTTCGTT | AY335441.2 |
| HSP70 | CAGCATCATTCACCATCCTTT | AGTCCTGGGTCGAGAAGATGT | AY206871 |
| HSP90 | AACACAGTCAGTTCATCGGCTAC | TCTTCTACCTTTGGCTTGTCATC | AY362761.1 |
| CYP450 | TCGAGGGCGTCGTAATCC | TCTTGGTCCTGCTGAAAATGG | FJ588641 |

# References

Bradford MM. (1976). A rapid and sensitive method for the quantitation of microgram quantities of protein utilizing the principle of protein-dye binding. Anal. Biochem. 72, 248-54. doi:10.1006/abio.1976.9999

Han Z, Sun J, Zhang Y, He F, Xu Y, Matsumura K, et al. (2013). iTRAQ-based proteomic profiling of the barnacle *balanus amphitrite* in response to the antifouling compound meleagrin. J. Proteome Res. 12, 2090-2100. doi:10.1021/pr301083e

Shilov IV, Seymour SL, Patel AA, Loboda A, Tang WH, Keating SP, et al. (2007). The paragon algorithm, a next generation search engine that uses sequence temperature values and feature probabilities to identify peptides from tandem mass spectra. Mol. Cell. Proteomics. 6, 1638-1655. doi:10.1074/mcp.T600050-MCP200
